# Supplementary material for: Development of a novel vitrification method for chondrocyte sheets
Source: Springer Nature journal article supplement (doi:10.1186/1472-6750-13-58), 2013-07-25
Supplement: 12896_2013_837_MOESM1_ESM.pdf [file 12896_2013_837_MOESM1_ESM.pdf]

## Additional file

**Additional file 1: Figure S1 Protective effect of COOH-PLL against fracture of vitrified solution.**

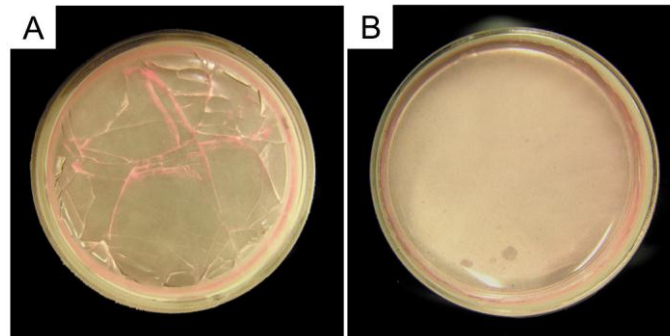

COOH-PLL-free (A) and COOH-PLL-containing (B) solutions in the process of rewarming after vitrification in liquid nitrogen vapor. Note the occurrence of many cracks in the COOH-PLL-free solution (A), while the COOH-PLL-containing solution is free of cracks (B). The opacity of the solution in B indicates that ice crystals formed during the warming process.
